# Supplementary material
Source: publisher site journal article supplement (http://www.degruyter.com/publication/journal_key/MAMM/downloadAsset/MAMM_Harvard_References%20Guide_MAMMALIA.pdf)
Supplement: Supplementary file 1 [file MAMM_Harvard_References%20Guide_MAMMALIA.pdf]

# REFERENCE STYLE HARVARD

## Full guide

### In-text citation

#### Direct citation

##### **Single author**

Paccagnella (2015)

##### **Two authors**

Borgonovi and Burns (2015)

##### **More than two authors**

Martin et al. (2014)

##### **Series of references**

Zabal et al. (2014) and Mohadjer et al. (2013a)

##### **Same author group with different years**

Smith et al. (1985, 1986)

##### **Same author group with same year**

Lawrence and David (2009a,b)

##### **Author (with same surname and different initials) with same year**

T. H. E. Smith et al. (2003) and A. Smith et al. (2003)

#### Indirect citation

##### **Single author**

(Paccagnella 2015)

##### **Two authors**

(Borgonovi and Burns 2015)

##### **More than two authors**

(Martin et al. 2014)

##### **Series of references**

Alphabetical order

(Mohadjer et al. 2013a; Zabal et al. 2014).

##### **Same author group with different years**

(Smith et al. 1985, 1986)

##### **Same author group with same years**

(Lawrence and David 2009a,b)

##### **Author (with same surname and different initials) with same year**

Alphabetical order

(A. Smith et al. 2003; T.H.E. Smith et al. 2003)

## Reference type

### Issue number

Not allowed

### Author initials

Abbreviated with dot and unspaced

### Reference list label/order

Alphabetical order

### Punctuation b/w journal title and volume

Only space

### Journal

Melitz, M. J. (2003). The impact of trade on intra-industry reallocations and aggregate industry productivity. *Econometrica* 71: 1695–1725.

### Journal with supplement/article number

Yuan, M. and Liu, H. (2011). The economic consequences of fair value accounting. *Account. Econ. Law*. 1 (Suppl. 2): 1–42.

### et al. usage

more than ten authors followed by et al.

Kaye, K., Day, R.D., Hair, E.C., Moore, K.A., Hadley, A.M., Teixeira, P.J., Helmschrott, S., Massing, N., Ackermann, D., Yuan, M., et al. (2009). Parent marital quality and the parent-adolescent relationship: effects on sexual activity among adolescents and youth. *Marriage & Fam. Rev.* 45: 270–288.

### Epub ahead of print (DOI)

Mason, E.B., Burkhart, K., and Lazebnik, R. (2018). Adolescent stress management in a primary care clinic. *Journal of Pediatric Health Care*, <https://doi.org/10.1016/j.pedhc.2022.05.019> (Epub ahead of print).

### Journal – in press/forthcoming

Tappy, L. and Lara, K.A. (in press). Metabolic effects of fructose and the worldwide increase in obesity. *Physiol. Rev.*

### Book/monograph

Andreasen, N.C. (2001). *Brave new brain: conquering mental illness in the era of the genome*. Oxford University Press, Oxford.

### Book with edition

Hicks, J.R. (1946). *Value and capital*, 2nd ed. Oxford: Clarendon.

### Edited book

Hertel, T.W. (Ed.) (1997). *Global trade analysis: modeling and applications*. Western Sydney University, Penrith.

### Edited book with chapter title (and editors)

Ferres, K. (2001). Idiot box: television, urban myths and ethical scenarios. In: Craven, I. (Ed.). *Australian cinema in the 1990s*. Frank Cass, London, pp. 175–188.

**Book series**

Langacker, R.W. (2004). Possession, location, and existence. In: Augusto S. and Gonçalves, M. (Eds.), *Linguagem, cultura e cognição: Estudos de linguística cognitiva*, Vol. I. Almedina, Coimbra, pp. 85–120.

**Proceedings/Conferences**

Chang, S.S., Liaw, L., and Ruppenhofer, J. (Eds.) (2000). *Proceedings of the twenty-fifth annual meeting of the Berkeley Linguistics Society, February 12-15, 1999: general session and parasession on loan word phenomena*. Berkeley Linguistics Soc., Berkeley.

**Electronic publications with DOI**

Filbee-Dexter, K., Wernberg, T., Norderhaug, K.M., Ramirez-Llodra, E., and Pedersen, M.F. (2018). Movement of pulsed resource subsidies from kelp forests to deep fjords. *Oecologia* 187: 291–304, <https://doi.org/10.1007/s00442-018-4121-7>

**Electronic publications without DOI**

Este, J., Warren, C., Connor, L., Brown, M., Pollard, R., and O'Connor, T. (2008). Life in the clickstream: the future of journalism. Media Entertainment and Arts Alliance, Available at: [https://www.academia.edu/17148635/Life in the Clickstream the Future of Journalism](https://www.academia.edu/17148635/Life_in_the_Clickstream_the_Future_of_Journalism) (Accessed 27 May 2009).

**Thesis/Dissertation**

Fayadh, K.H. (2015). *The legal regulation of assisted reproductive technology in Iraq: lessons from the Australian approach*, Ph.D. thesis. Penrith, Western Sydney University.

**Report**

Pataki, Z. (2014). The cost of non-Europe in the single market. Technical Report 9051, European Parliamentary Research Service.

**Patent**

Smith, P.S. (2002). A pump for use in windmill assembly, application no. 2008230011.

**Standards**

Standards Australia (1989). *Electrical equipment for coal mines – insulating materials – materials for insulating power conducting components* (AS 1147.1-1989).

**Websites**

Graciolli, G. (2020). *Catálogo taxonômico da Fauna do Brasil*, Available at: <http://fauna.jbrj.gov.br/fauna/faunadobrasil/2624> (Accessed 26 May 2022).

**Database**

Milberger, S. (2002). *Evaluation of violence against women with physical disabilities in Michigan, 2000–2001*. ICPSR version. Detroit: Wayne State University. Distributed by Ann Arbor, MI: Inter-University Consortium for Political and Social Research. <https://doi.org/10.3886/ICPSR03414>

**Corporate publication**

Institute of Chartered Accountants in Australia (2004). *AASB standards for 2005: equivalents to IFRSs as at August 2004*, Person Education, Sydney, Australia.
